# Telomere elongation during early development is independent of environmental temperatures in Atlantic salmon

**Authors:** McLennan D. (1), Armstrong J.D. (2), Stewart D.C. (2), Mckelvey S. (3) Boner W. (1), Monaghan P. (1) & Metcalfe N.B. (1)

1) Institute of Biodiversity, Animal Health and Comparative Medicine, Graham Kerr Building, University of Glasgow, Glasgow, G12 8QQ, UK.

(2) Marine Scotland – Science, Freshwater Laboratory, Faskally, Pitlochry, PH16 5LB, UK.

(3) Cromarty Firth Fishery Trust, CKD Galbraith, Reay House, 17 Old Edinburgh Road, Inverness, IV2 3HF.

**Corresponding author:** Darryl McLennan, Institute of Biodiversity, Animal Health and Comparative Medicine, Graham Kerr Building, University of Glasgow, Glasgow, G12 8QQ, UK. Fax: 0141 330 5971. Email: darryl.mclennan@glasgow.ac.uk

**Key words:** oxidative stress, environmental effect, cell proliferation, physiology, fish

**Summary statement:** We show in salmon that telomeres significantly lengthen between the embryonic and larval stages of development, and that this is not influenced by environmental temperature.

## ABSTRACT

There is increasing evidence from endothermic vertebrates that telomeres, which cap the ends of chromosomes and play an important role in chromosome protection, decline in length during postnatal life and are a useful indicator of physiological state and expected lifespan. However, much less is currently known about telomere dynamics in ectothermic vertebrates, which are likely to differ from that of endotherms, at least in part due to the sensitivity of ectotherm physiology to environmental temperature. We report here on an experiment in which Atlantic salmon were reared through the embryonic and larval stages of development, and under differing temperatures, in order to examine the effects of environmental temperature during early life on telomere dynamics, oxidative DNA damage and cellular proliferation. Telomere length significantly increased between the embryonic and larval stages of development. Contrary to our expectations, variation in telomere length at the end of the larval stage was unrelated to either cell proliferation rate or the relative level of oxidative DNA damage, and did not vary between the temperature treatments. This study suggests that salmon are able to restore the length of their telomeres during early development, which may possibly help to buffer potentially harmful environmental effects experienced in early life.

## INTRODUCTION

Conditions experienced in early life can have permanent effects on individual phenotypes (Lindström, 1999; Monaghan, 2008). Such effects might decrease or increase fitness, depending on whether the early life conditions were relatively poor or good. For example, environmental conditions during growth have been linked to future reproductive performance (Ohlsson et al., 2002; Spencer et al., 2003; Auer et al., 2010; Lee et al., 2012), adult body mass (Douhard et al., 2013) and competitive ability (Royle et al., 2005), as well as impacting long-term adult health (Gluckman et al., 2008). Notably, there has been increasing interest in the long-term effects of early life environmental conditions on ectotherms, since their development may be altered under the influence of an increasingly warming world (Zuo et al., 2012).

A potential mechanistic link between early life conditions and later life viability lies in the telomeres, which cap the ends of eukaryotic chromosomes and play an important role in chromosome protection (for reviews see Blackburn, 1991; Campisi et al., 2001; Monaghan, 2010). Telomere loss occurs at each round of cell division as a result of the ‘end replication problem’, but the amount of loss may in part be influenced by other factors, including levels of oxidative damage to the telomeric DNA (McLennan et al.; Reichert and Stier, 2017; Monaghan and Ozanne, 2018). Telomeric DNA has a high guanine content, which is particularly susceptible to oxidative damage and there is relatively little repair of oxidative damage in the telomeric regions (Passos et al., 2007; Monaghan and Ozanne, 2018). A relatively short telomere length is generally considered indicative of relatively poor biological state. A growing number of studies have linked a shorter telomere length to reduced life expectancy and/or adult performance (Heidinger et al., 2012; Boonekamp et al., 2014; Cram et al., 2017; Salmón et al., 2017; Wilbourn et al., 2018), as well as to an increased probability of population extinction (Dupoué et al., 2017). Moreover, telomeres are known to undergo shortening in response to early life adversity (Herborn et al., 2014; Nettle et al., 2015; Ridout et al., 2017).

However, most of the telomere studies to date have focussed on humans (e.g. Broer et al., 2013) and other mammals and birds (Olsson et al., 2018), and these endothermic taxa mostly appear to down-regulate telomere restoration mechanisms in post-embryonic somatic tissue and use replicative ageing as a tumour suppression mechanism (Gomes et al., 2010). In contrast, a number of studies have detected telomere restoration mechanisms (mostly by the enzyme

telomerase) to extend into at least juvenile life in ectotherms (Yap et al., 2005; Peterson et al., 2015; Hatakeyama et al., 2016; Ujvari et al., 2017; Yip et al., 2017). Therefore, ectothermic species may be more likely to maintain their telomere length (and thus their genome stability) until later in life, compared to endotherms. This has presumably evolved in tandem with other life history traits and possibly alternative tumour protection mechanisms. It could also help to buffer the long-term consequences of potentially harmful environmental effects experienced in early life.

One of the most important factors that may influence ectotherm telomere dynamics is environmental temperature, with a number of studies linking ectotherm telomeres to environmental temperatures that could be classified as stressful (Debes et al., 2016; Simide et al., 2016; Dupoué et al., 2017). However, non-stressful temperature variation could also affect early life telomere dynamics in ectotherms through several different routes. Firstly, ambient temperature directly affects the maintenance rate of metabolism (Jonsson and Jonsson, 2011) and so possibly also the production of Reactive Oxygen Species (ROS) (Abele et al., 2002; Salin et al., 2015). It has been suggested that ROS act as the underlying mechanism that links variation in telomere length to environmental stressors (Haussmann and Marchetto, 2010), such as environmental temperature (Abele et al., 2002; Bae et al., 2016). However, more detailed studies are still needed to test this potential mechanism *in vivo* (Boonekamp et al., 2017; Reichert and Stier, 2017; Monaghan and Ozanne, 2018). It is interesting to note that to date, two studies on fish did not find a significant correlation between temperature and levels of oxidative damage *in vivo* (Vinagre et al., 2012; Hemmer-Brepson et al., 2014).

Environmental temperatures also affect developmental rates. Individuals experiencing different temperature regimes could vary significantly in developmental stage for a given chronological age (and vice versa). Few studies have attempted to disentangle the separate effects of developmental rate and chronological age on telomere dynamics. However, it is possible that individual ectotherms that differ in developmental rate (but are of the same age) will also differ in telomere length, since developmental rate could be linked to rates of cell division and, potentially, levels of oxidative damage. For example, accelerated development has been associated with increased antioxidant levels in amphibian tadpoles, possibly to counteract an increased oxidative threat (Gomez-Mestre et al., 2013; Burraco et al., 2017). Alternatively, it is possible that telomere length could differ between individuals of different

ages (but of the same developmental stage) since those that are relatively older at a given developmental stage may have accumulated more oxidative damage over time.

Finally, temperature can also affect the way that ectotherm embryos grow. Embryonic growth is due to a mix of both cell division (hyperplasia) and cell growth (hypertrophy), but the balance between the two processes depends on temperature (reviewed by Arendt, 2007). This has implications for telomere dynamics since telomere loss occurs during hyperplasia (i.e. at each cell division) but not during hypertrophy. Fish eggs incubated at warmer temperatures produce fry that have fewer but larger muscle fibres, indicating a shift in the balance from hyperplasia to hypertrophy (Stickland et al., 1988; Usher et al., 1994). A possible explanation for this effect is that levels of dissolved oxygen reduce with increasing water temperature, which will limit an individual's capacity for cell proliferation (Matschak et al., 1997). Therefore, embryos developing in relatively warmer water appear to be achieving growth by disproportionately increasing the size of their existing cells (hypertrophy) – which might result in having longer telomeres for a given body size than conspecifics developing in colder water.

In this experiment, we examined telomere length at two early life stages (embryo and larva) in Atlantic salmon *Salmo salar*, and whether this was influenced by differences in environmental temperature. We also examined two potential mechanistic pathways (levels of oxidative DNA damage and rates of cell proliferation) that may link temperature and telomere length, with the predictions that: A) there would be a positive relationship between incubation temperature and levels of oxidative damage, and B) there would be a negative relationship between incubation temperature and cell proliferation rate, with a relative shift from cell division to cell growth at relatively warmer temperatures.

## METHODS

### *Study Species*

Salmon have two distinct life stages prior to being independent of maternal yolk and feeding on exogenous food. Embryos spend the first several months of development encapsulated within an egg membrane, referred to as the 'eyed embryo' stage, when the dark eyes of the developing embryo are visible through the transparent membrane. Embryos generally develop eyes (i.e. reach the eyed stage) roughly half way between the dates of fertilisation and hatching

(Verspoor et al., 2007). The embryo then hatches into the alevin (= larval) stage, which gradually become more able to swim as the attached yolk sac is depleted. Complete resorption of the yolk sac marks the end of larval development and the transition to the first-feeding fry stage. Salmon are ideally suited to this study, since they reproduce by external fertilisation (and so their matings can be easily controlled using *in vitro* fertilisations (IVF)). They produce large clutches of relatively large eggs with a long embryonic and larval period (typically around 5-6 months between fertilisation and first feeding at average water temperatures), which can therefore be divided among temperature treatments, thereby enabling the genetic mix in different experimental groups to be controlled.

### ***In vitro fertilisation***

In this experiment, we used a full-sibling IVF design, utilising parents that had spent only one winter at sea (1SW) before returning to the river to spawn. The time spent at sea was initially determined by size (1SW fish are usually smaller than those that remain at sea for longer) but subsequently confirmed by scalimetry (Shearer, 1992). On December 8<sup>th</sup> 2014, wild parent fish were captured at the Loch na Croic fish trap on the River Blackwater system, northern Scotland (57° 60'N, 4°63'W), whilst undertaking their return spawning migration (see McLennan et al. (2016) for further details of the standard capture procedure). Prior to the stripping of gametes, parent fish were anaesthetised using a 5% benzocaine solution. Each 1SW female was blotted dry and stripped of eggs, with approximately 150 eggs being retained for this experiment whilst the rest of the clutch was used for stocking purposes by the hatchery. A randomly chosen 1SW male was then blotted dry and stripped of sperm to fertilise the experimental sample of eggs. This design was repeated 22 times (using new fish each time) to produce 22 independent full-sib families, all fertilised on December 8<sup>th</sup> 2014. After mixing the sperm and eggs together for several minutes, each egg batch was washed and then placed in fresh water for at least 1 hour to promote water hardening (the stage at which the eggs absorb water and become firm).

### ***Temperature treatment***

The experimental eggs were then transferred to the aquarium facilities at the University of Glasgow, Scotland. Each of the 22 families of eggs was divided into 3 equal batches, with each batch being allocated to a temperature treatment group (4°C, 6°C or 8°C). The lowest of these represented the ambient water temperature in the source river during the egg incubation period

(December – February mean temperature:  $3.90 \pm \text{s.d. } 0.91^{\circ}\text{C}$ , pers. obs. from the previous winter), while  $6^{\circ}\text{C}$  and  $8^{\circ}\text{C}$  represented relatively warmer embryonic environments within the natural range experienced by this species (Jonsson and Jonsson, 2011). For each treatment group, eggs were held in baskets (one per family) distributed randomly within a tank (100cm X 100cm X 40cm) that was oxygenated by a standard air stone. All treatment groups were held overnight at  $4^{\circ}\text{C}$ . The  $6^{\circ}\text{C}$  and  $8^{\circ}\text{C}$  groups were then slowly increased from  $4^{\circ}\text{C}$  to their target temperature at a rate of  $0.5^{\circ}\text{C}/\text{day}$ . Water temperatures within each of the treatment tanks were held at the required temperature using automated water chillers (Teco Tr25, Ravenna, Italy). Eggs were checked daily and any dead individuals were removed.

On February 13th 2015, by which time all families had reached the eyed embryo stage, five individuals were sampled per family (110 in total) from each of the three treatments and were flash frozen for subsequent analysis of telomere length and DNA damage at the eyed embryo stage of development (hereafter referred to as the embryo stage). Sampled embryos were all the same chronological age (days since fertilisation) but at different developmental stages due to the temperature manipulation, with embryos in the warmest treatment having the most advanced development (Fig. 1).

The remaining embryos were allowed to continue development through to the end of the larval stage when the fish were close to taking exogenous food. This was identified by regularly checking the size of the remaining yolk sac until only a minimal amount remained, following the approach of Metcalfe and Thorpe (1992). When all families within a given treatment were estimated to be approximately 1 week prior to the exogenous food stage, again following the approach of Metcalfe and Thorpe (1992), 10 larvae per family were randomly collected, euthanized and measured for fork length and body mass. Five of the larvae were stored in 10% formaldehyde solution for subsequent immunohistochemical analysis (110 in total from each temperature treatment) and the remaining five from each family (110 in total from each temperature treatment) were flash frozen for subsequent analysis of late larval telomere length and DNA damage. The  $8^{\circ}\text{C}$ ,  $6^{\circ}\text{C}$  and  $4^{\circ}\text{C}$  treatment fish reached this late larval stage (hereafter referred to as the larva stage) on 3<sup>rd</sup> April, 25<sup>th</sup> April and 7<sup>th</sup> July 2015 respectively. As a result, these larva samples were all at the same developmental stage but differed in chronological age (due to the temperature manipulation, see Fig. 1). For additional confirmation that we had sampled the larvae in each of the temperature treatments at approximately the same developmental stage, we calculated the mean coefficient of variation for body mass and body

length across the three temperature treatments (which were 2.96 for mass and 1.48 for length). In addition, we also assessed how similar the heterogeneity of body mass and length was across the three temperature treatments by calculating the coefficient of variation (CV) across families in a given treatment. For body mass, the CV was 11.9, 11.1 and 12.3 at 4, 6 and 8°C respectively, while for body length it was 2.5, 3.1 and 2.5 at 4, 6 and 8°C respectively. This suggests that no selective disappearance of slower or faster-growing individuals had occurred. The larva samples that were fixed in 10% formaldehyde were transferred to 70% ethanol three days after sampling, for long-term storage at room temperature. Mortality was minimal (we estimate < 5%) and was similar across all of the families and temperature treatments, again suggesting that there was little likelihood of any bias arising from selective disappearance. However, for reasons unknown, all of larva from family 8 that were incubated at the intermediate 6°C temperature treatment experienced mass mortality over the course of a few days. Therefore, there were 21 samples for the larva stage at this temperature treatment.

#### ***DNA extraction and telomere analysis***

DNA extraction and telomere analysis were conducted on pooled tissue samples (either 5 embryos or 5 larvae) for each family at each of the temperature treatments. The flash frozen embryos and larvae from each family were thawed slowly in ice-cold PBS. Embryos were homogenised using a disposable tissue grinder, while larvae were homogenised in 1ml of ice-cold 1 x PBS in a 2ml tube containing a ceramic bead. The homogenates were then passed through a 100µm mesh cell strainer along with ice-cold PBS to a total volume of 50ml. Samples were left for 1 minute, to allow larger aggregates of tissue to settle at the bottom of the flask. For each sample, 3ml of supernatant (containing the single cell suspension) was then transferred to a clean 15ml centrifuge tube and centrifuged at 500 x g for 10 minutes at 4°C. The supernatant was then discarded and cell pellets were held on ice until ready for extraction.

DNA extraction was performed on the cell pellets to which 180 µl buffer ATL + 20 µl of proteinase K solution (20 mg/ml) was added. Samples were then incubated at 56°C until cells were fully lysed. DNA was then extracted from the lysate using the DNeasy Blood and Tissue Kit (Qiagen), following the manufacturer's protocol. Each set of DNA extractions conducted also included a negative control which contained all of the reagents, but without any tissue. This was used to check for contamination during the lysis and extraction steps. DNA concentration and purity was measured spectrophotometrically using a Nanodrop 8000.



Telomere length was measured in all samples using quantitative PCR (Cawthon, 2002), and data were analysed using qBASE software for windows (Hellemans et al., 2007), as described in McLennan et al. (2016). Interstitial telomere sites (ITS) could potentially add noise to the qPCR measurement, however Atlantic salmon chromosomes are not thought to have a significant amount of ITS (Perez et al., 1999). In brief, the qPCR method produces a relative measurement of telomere length (RTL) and is calculated as a ratio (T/S) of telomere repeat copy number (T) to a stable copy number gene (S). In this experiment, we used the well-established Glyceraldehyde-3-phosphate dehydrogenase (GAPDH) gene as the S gene. Performing a BLAST search on the Genbank sequence used in our GAPDH primer design (accession number: NM\_001123561) confirmed that this sequence is present at a single location in the Atlantic salmon genome. There was also little variability in the Ct values for the GAPDH PCR, which indicates a stable frequency in the genome. In addition to the samples, each plate also included a six-fold serial dilution of a reference sample (1.25 - 40 ng/well) and a non-target control (NTC). The DNA for the serial dilution was a pool of 24 samples that included both life stages (embryo and larva). The serial dilution was used to generate a standard curve and calculate assay efficiencies. The NTC contained all reaction components apart from DNA and was included on each plate (in triplicate) to check for non-specific binding and potential contamination between sample wells. The mean assay efficiencies for the telomere and GAPDH were 91.9% and 94.5% respectively, well within the acceptable range (85-115). The average intraplate variation of the Ct values was 1.43 for the telomere assay and 0.49 for the GAPDH assay, respectively. The average interplate variation of the Ct values was 1.88 for the telomere assay and 1.10 for the GAPDH assay, respectively. The 6 points of the standard curve were used to calculate the inter-assay coefficient of variability of the telomere measurements (which was 9.33).

### ***Oxidative DNA damage assay***

Oxidative damage to DNA was quantified by measuring levels of 8-hydroxy-2'-deoxyguanosine (8-OHdG). 8-OHdG is a product of the DNA excision-repair mechanism that occurs when the base guanine is oxidatively damaged; therefore, it is generally accepted as a sensitive marker of the oxidative challenge to DNA at the time of measurement (Valavanidis et al., 2009). The same extract of DNA was used as for the telomere analysis. We quantified 8-OHdG using a commercial kit, following the manufacturer's protocol (Epigentek, item no. P-6003). In brief, the colourimetric kit detected 8-OHdG by using capture and detection

antibodies specific to 8-OHdG. From this, a relative quantification of 8-OHdG was calculated as the percentage of DNA in a sample that was damaged. Each plate included a five point standard curve that was made from a positive control of known damage. The assessment of damage in the unknown samples was adjusted according to the absorbance readings of the standard curve, so that potential inter-plate variation was partially accounted for. The level of DNA damage in our samples was relatively low, therefore, we used a more dilute standard curve (1.56 – 25 pg/μl 8-OHdG) than that suggested in the manufacturer's protocol (5 – 200 pg/μl 8-OHdG). The two life stages of a given family (i.e. embryo and larva) were measured on the same plate. All samples were run in duplicate, and the replicate measurements were found to be consistent (intra class correlation coefficient = 0.821;  $F_{131, 131} = 5.90$ ,  $p < 0.001$ ).

### ***Muscle cell proliferation analysis***

For this experiment, we chose to quantify the rate of cell proliferation in the anterior muscle of the larvae, since muscle is by far the largest tissue in Atlantic salmon, and somatic growth is closely linked to variation in muscle cell proliferation (Weatherley et al., 1988). To do so, we conducted an immunohistochemical analysis using an antibody stain specific to the proliferative cell nuclear antigen (PCNA) protein. PCNA is essential in cell replication and is actively expressed in nuclei during the DNA synthesis phase of cell division (Yu et al., 1992). It has been successfully used to measure cell proliferation rates in a variety of fish species (for examples see Ortego et al., 1994; Kilemade et al., 2002; Abdo et al., 2014; Peterson et al., 2015).

Immunohistochemistry was performed by the University of Glasgow Veterinary Diagnostic Service. For each treatment, two individual larvae per family (that had been preserved in formaldehyde and stored in ethanol) were embedded longitudinally in paraffin and sectioned at a thickness of 2.5μm. Antigen retrieval (i.e. the exposure of antigenic sites, allowing antibodies to bind) was employed using heat induced epitope retrieval (HIER) in a sodium citrate buffer pH6, for 10 minutes at 110°C. Sections were stained using a DAKO autostainer. The primary antibody was PCNA (Santa Cruz PCNA (FL-261) cat. No. sc-7907), dilution 1:100, incubated for 30 minutes. The secondary antibody (which binds to the primary antibody and assists in detection) was Dako EnVision+ System-HRP labelled polymer anti-rabbit, incubated for 30 minutes at room temperature. Visualisation was achieved using Dako + DAB

Substrate and Chromogen. Sections were counterstained with the nuclei-specific Gills Haematoxylin for 27 seconds.

Stained slides were then scanned at the Marine Scotland Marine Laboratory in Aberdeen, using the Dot Slide virtual microscopy system (version 2.5) at a resolution of 40x. In order to select the same body regions for analysis on all specimens, a reference line was drawn along the maximum longitudinal axis of the remaining yolk sac of each larva and the anterior-most point, the 1<sup>st</sup> quartile and the 2<sup>nd</sup> quartile point along this line were identified. The most dorsal region of myotome muscle was identified in relation to these three points and used for image capture (Fig. 2A). Images were captured at 26x magnification (area = 0.03 mm<sup>2</sup>). Since there were two larvae from the same family per temperature treatment, and three images were captured per larva, this gave six images per family from each treatment.

Previous studies have shown that PCNA has a relatively long half-life, meaning that residual PCNA may continue to be present in cells that have fully completed division (Scott et al., 1991). In addition, there is a relatively high cell turnover rate at the embryonic stage, which meant that most cells had incorporated some of the PCNA-specific stain. To overcome the noise of this historical cell division, we adopted the approach of Kilemade et al. (2002) in distinguishing between intensely PCNA-positive (IP) nuclei (i.e. those actively dividing) and weakly PCNA-positive (WP) nuclei (those no longer dividing), using Image J to distinguish objectively and consistently which nuclei were intensely PCNA positive.

We first quantified the total number of nuclei in an image by conducting the following three steps: 1) the image was converted into an 8 bit grey scale format; 2) stained areas were identified by selecting all pixels that had an intensity between 0-165 (0 = black, 255 = white) and 3) the Analyse Particle tool in Image J was then used to differentiate between true nuclei (which we set as a minimum of 120 clustered pixels) and smaller randomly stained artefacts (see Fig. 2C for an example of the output from this process). The number of nuclei was then counted by Image J. We then used Image J again to analyse the same image, but this time to identify only nuclei that were intensely PCNA-positive (IP), by repeating the above three steps but this time increasing the 8 bit intensity threshold to <90 rather than <165 (Fig. 2D). Therefore, by using Image J to separately identify the total number of nuclei (Fig. 2C) and the number of IP nuclei (Fig. 2D) from the same image, we were able to estimate the percentage of nuclei in that image that were actively undergoing cell replication at the time of sampling.

Furthermore, since all images were captured at the same magnification (and were therefore of the same area of tissue), we were also able to generate a cell size index by taking the inverse of the total number of nuclei per image (i.e. the higher the value, the larger the cells).

### ***Statistical analysis***

In total, there were 22 telomere length and DNA damage measurements (one per family) for each of the three temperature treatments at both the embryo and larva stage; giving 132 data points for the telomere and DNA damage analyses. Cell proliferation was quantified at the larva stage only, giving 66 data points (one mean value calculated per family for each treatment). We measured/calculated the following variables to be used in statistical models, where appropriate: relative telomere length at the embryo (*embryo RTL*) and larva stage (*larva RTL*); the percentage of DNA that was damaged (i.e. % 8-OHdG) at the embryo (*embryo DNA damage*) and larva stage (*larva DNA damage*); average fresh weight of the larvae, calculated as an average for each family (*larva weight*); the percentage of intensely stained PCNA nuclei at the larva stage (*larva cell proliferation*); the inverse of the number of cells per unit area, as a proxy for cell size (*larva cell size index*); the life stage at which a sample was taken (i.e. whether at the embryo or larva stage, and subsequently referred to as *life stage*) and the aquarium temperature treatment (*temp. treatment*).

Firstly, we ran a linear mixed model (LME) to assess whether there was a significant change in telomere length between the two life stages and between the temperature treatments (model A). We then ran six further LMEs to assess factors affecting variation in larva weight (model B), larva cell proliferation rate (model C), embryo RTL (model D), larva RTL (model E), embryo DNA damage (model F) and larva DNA damage (model G). Family ID was included as a random factor in each analysis, to give a repeated measure design. For a full outline of the statistical models and the variables included in each, please see Table 1.

We used a Pearson correlation coefficient matrix to assess potential collinearity between explanatory variables (with a cut-off coefficient of 0.7). Larva weight and length were identified as being highly collinear (Pearson  $r = 0.81$ ,  $p < 0.001$ ) and therefore only larva weight was used for subsequent analyses. The models were simplified using backwards model selection, The Akaike Information Criterion (AIC) was used during model fitting and variables were only removed from a model if this resulted in a relative reduction of the AIC score. All

statistical analyses were carried out using IBM SPSS 22 for Windows. For a summary of the seven final linear mixed-effect models, please see Table 2.

This experiment was approved by the University of Glasgow local ethical review panel, and all procedures were carried out under the jurisdiction of a UK Home Office project licence (PPL 60/4292).

## RESULTS

### *Telomere dynamics*

Telomere length significantly increased between the two life stages (embryo to larva) for each of the 3 temperature treatment groups. However, the relative amount of telomere elongation was dependent on the temperature treatment (significant life stage x temperature treatment interaction; Table 2A). Individuals reared at the coldest temperature had the longest telomere length when measured at the embryo stage (Table 2D, Fig. 3) but then underwent the smallest change in telomere length, so that by the late larva stage the three temperature treatment groups had similar telomere lengths (Fig. 3; note no effect of temperature treatment in Table 2E). However, these effects must be interpreted with caution, since at the embryo stage all the sampling was done on the same day so embryos from the three temperature treatments were the same chronological age, but were at different stages of development (warmer temperatures = more advanced). In contrast, at the larva stage all groups were at the same developmental stage (= completion of yolk absorption), but were of different chronological ages. Temperature treatment had no effect on the body mass of the larvae at the first feeding stage (Table 2B).

### *Muscle cell proliferation rate*

The rate of cell proliferation in the anterior muscle of the larvae differed according to rearing temperature (Table 2C). Individuals in the intermediate temperature group had the highest percentage of intensely stained PCNA nuclei; i.e. the highest rate of cell proliferation (Fig. 4). However, this variation in cell proliferation rate was not significantly associated with the index of cell size, larva mass (Table 2C) or larva telomere length (Table 2E). The index of cell size was unrelated to telomere length.

### ***Oxidative DNA damage***

Levels of DNA damage (8-OHdG) were not significantly different between the temperature treatments at either the embryonic (Table 2F) or the larval stage (Table 2G), nor was variation in DNA damage levels associated with telomere length at either life stage (Table 2D and 2E). It should also be noted that the level of DNA damage at each life stage was relatively low ( $5.2 \pm \text{se } 0.5\text{pg}$  at the embryo stage and  $8.3 \pm \text{se } 0.7\text{g}$  at the larva stage), so that the majority of samples had damage levels at the lower end of the assay's detection limit (2pg).

## **DISCUSSION**

In this study, we found that telomere length significantly increased between the embryonic and larval phases of development in Atlantic salmon. In a previous salmon study (McLennan et al., 2016) we also found a significant increase in telomere length between two time points at the embryonic stage of development, separated by 18 days. This study supports that finding, and further suggests that this telomere elongation extends beyond the embryonic stage and continues at least into the larval stage.

We found a negative correlation between developmental rate and telomere length at the eyed egg stage. All embryos were sampled on the same day, and were therefore all the same chronological age, but at slightly different developmental stages. Embryos reared at the coldest temperature (i.e. the least developed at the time of sampling, having only just reached the eyed stage) had the longest mean telomere length, while those reared at the warmest temperature (the most developed, having reached the eyed stage slightly earlier) had the shortest telomeres. It may be that telomeres decrease in length during embryonic development (e.g. because of rapid cell proliferation), but are then restored during later larval stages; perhaps due to temporal changes in telomerase activity (Hatakeyama et al., 2016). In support of this, there was no significant difference in telomere length between the three temperature treatment groups at the late larval stage, when all groups were at the same developmental stage, but different chronological ages. This study used a cross-sectional approach since it is not currently possible to sample embryonic tissues non-destructively, which would be necessary for a longitudinal approach. As such, while it is possible that our finding of relatively longer telomeres at the larval stage could have been due to the selective mortality of embryos with shorter telomeres,

this is extremely unlikely since mortality was minimal (we estimate < 5%) and similar across all of the families.

In general, telomeres have been found to shorten with age, at least in many post-embryonic mammal and birds studied to date (Hausmann et al., 2003; Henriques and Ferreira, 2012) and it has been suggested that telomerase expression during human embryonic development is to maintain, rather than elongate embryo telomere length (Liu et al., 2007). Much less is known about telomere dynamics during fish embryo development. We have shown in this study that telomere lengths in Atlantic salmon are significantly longer at the larval stage (i.e. at the point when the fish have used up all yolk reserves and begin to feed on exogenous food) compared to the earlier embryonic stage. Other studies of ectotherms have also found post-embryonic life stages in which telomeres appear to lengthen, even if they then decrease in late adulthood (Hatakeyama et al., 2016; Ujvari et al., 2017). Therefore it may be that, in contrast to endotherms, telomerase expression in ectotherms in the later stages of development is capable of not only maintaining telomere length, but also elongating it – or that a different mechanism for restoring telomeres is at play; such as alternative lengthening of telomeres (ALT) (Henson et al., 2002). The reasons for this are currently unknown. However, it may be linked to the fact that most ectotherms are capable of growing through life, and so invest in telomere elongation during development in order to prepare cells for sustained proliferative capacity later in life (Gomes et al., 2010). Our results also suggest that salmon embryos may be able to regulate the length of their telomeres towards the end of larval development, thus compensating for loss at earlier embryonic stages.

The temperature manipulation was not linked to levels of oxidative damage to DNA at either the embryo or larva stage, nor was variation in DNA damage levels associated with variation in telomere lengths at either stage. There is still a limited understanding of how oxidative damage may affect telomere dynamics *in vivo* (Boonekamp et al., 2017; Reichert and Stier, 2017) and therefore it is possible that there is no mechanistic link between oxidative DNA damage and early life telomere dynamics in Atlantic salmon. However, there are also several points from this study that are worthy of discussion. Firstly, the level of DNA damage at each life stage was relatively low; therefore, these early life stages may not have accumulated sufficient oxidative damage to allow detection of significant patterns. It is also worth noting that we measured DNA damage by quantifying 8-OHdG, which is a product of the DNA excision-repair mechanism that occurs when guanine is oxidatively damaged, rather than being a direct marker of the DNA damage itself. While the two are often highly correlated, it is also



possible that the relatively low levels of 8-OHdG in our samples reflect reduced DNA repair activity at the time of measurement, irrespective of the levels of accumulated damage. It may also be that any potential temperature effects on oxidative damage were buffered by an upregulation of antioxidants, as suggested by Hemmer-Brepson et al. (2014). Another possibility is that any possible link between levels of DNA damage and telomere lengths was buffered by the significant telomere elongation we observed.

The rate of cell proliferation in the larvae differed significantly between the different temperature treatments, with salmon larvae that had been reared at the intermediate water temperature (6°C) having the highest cell proliferation rate. The optimal temperature for growth in juvenile Atlantic salmon is thought to be around 16°C (Elliott and Hurley, 1997). However, cell proliferation in Atlantic salmon is greatest at temperatures lower than the optimal growth temperature (Stickland et al., 1988; Usher et al., 1994; MacQueen et al., 2008). Considering these studies collectively, they suggest that cell proliferation rates may be maximised around 5°C in Atlantic salmon, which supports the pattern observed in this study. It is reasonable to assume that this temperature is warm enough to allow sufficient metabolism and growth to occur, yet cold enough that there will be a sufficient concentration of dissolved oxygen to allow this growth to occur by cell proliferation, since cell proliferation is oxygen demanding (Matschak et al., 1997).

Although incubation temperature influenced the rate of cell proliferation in the anterior muscle of the larvae, this was not linked to differences in mean telomere length. Again, it may be that the significant elongation of telomere length occurring in late larval development was buffering the effects of cell division on telomere lengths. It is not known how these relationships change in later life, when telomerase expression may be down regulated and growth and behaviour may have caused greater among-individual variation in physiological stress, oxidative stress levels and telomere dynamics. This is especially relevant in fish, where muscle fibre recruitment continues well beyond the embryo stage (Weatherley et al., 1988) – indeed, active cell proliferation in muscle tissue is still detectable in late juvenile Atlantic salmon that have migrated to sea (Johnston et al., 2003).



We have shown that telomere length significantly increases during early development in Atlantic salmon, suggesting that ectotherms regulate early life telomere dynamics in ways that contrast to patterns seen in endotherms. This supports observations made in other fish species (e.g. Hatakeyama et al., 2016). Our temperature treatment affected the development rate of the early life salmon, as well as the rate of their cell proliferation. However, there was no significant difference in telomere length by the time the larvae were approaching the first feeding stage, suggesting that they are able to restore the length of their telomeres irrespective of the environmental temperature experienced during early development. These results contribute towards the assessment of how ectothermic species may alter their early life physiology in order to acclimatise to changing environmental conditions. It would now be interesting to examine the longer-term effects of early life environmental conditions on ectothermic telomere dynamics, as well as the potential associated telomere elongation mechanisms.

## **Acknowledgments**

Results in this paper are reproduced from the PhD thesis of Darryl McLennan (University of Glasgow, 2016). We thank SSE for use of the Conon facilities. We are grateful to L. Mckelvey, E. Rush and all staff at the Cromarty Fisheries Trust for assistance with IVF manipulation and egg husbandry. We thank G. Law, G. Anderson and the rest of the University of Glasgow aquarium staff for help with the aquarium temperature manipulation and S. Auer for help with statistics. We are also grateful to M. Fordyce and S. Soares from Marine Scotland – Science, Marine Laboratory for assistance with the cell proliferation analysis. A. Stier and two anonymous referees provided very useful comments on earlier versions of the manuscript.

## **Competing interests**

No competing interests declared.

## **Author contributions**

DM, SM, JDA, PM and NBM contributed to experimental design. DM and SM carried out the IVF manipulations, while DCS analysed fish scales to determine parental years at sea. The telomere assay was optimised by DM and WB and DM performed the laboratory analysis. DM performed the data analysis, with additional comments from PM and NBM. The paper was written by DM, with additional comments from WB, PM and NBM.

## **Funding**

D. McLennan was funded by NERC studentship NE/K501098/1, in collaboration with Marine Scotland Science, N. Metcalfe by ERC Advanced Grant 322784 and W. Boner and P. Monaghan by ERC Advanced Grant 268926.

## **Data availability**

Should this paper be accepted for publication, data sets corresponding to the statistical models will be deposited in a Dryad repository.

## REFERENCES

- Abdo, W., Ghattas, S., Sakai, H., Hirata, A. and Yanai, T.** (2014). Assessment of proliferative activity by proliferative cell nuclear antigen (PCNA) and anti-bromodeoxyuridine (BrdU) immunolabeling in the tissues of Japanese eels (*Anguilla japonica*). *Turkish Journal of Fisheries and Aquatic Sciences* **14**, 413-419.
- Abele, D., Heise, K., Pörtner, H. O. and Puntarulo, S.** (2002). Temperature-dependence of mitochondrial function and production of reactive oxygen species in the intertidal mud clam *Mya arenaria*. *Journal of Experimental Biology* **205**, 1831-1841.
- Arendt, J.** (2007). Ecological correlates of body size in relation to cell size and cell number: patterns in flies, fish, fruits and foliage. *Biological Reviews* **82**, 241-256.
- Auer, S. K., Arendt, J. D., Chandramouli, R. and Reznick, D. N.** (2010). Juvenile compensatory growth has negative consequences for reproduction in Trinidadian guppies (*Poecilia reticulata*). *Ecology Letters* **13**, 998-1007.
- Bae, E., Samanta, P., Yoo, J. and Jung, J.** (2016). Effects of multigenerational exposure to elevated temperature on reproduction, oxidative stress, and Cu toxicity in *Daphnia magna*. *Ecotoxicology and Environmental Safety* **132**, 366-371.
- Blackburn, E. H.** (1991). Structure and function of telomeres. *Nature* **350**, 569-573.
- Boonekamp, J. J., Bauch, C., Mulder, E. and Verhulst, S.** (2017). Does oxidative stress shorten telomeres? *Biology Letters* **13**, 20170164.
- Boonekamp, J. J., Mulder, G. A., Salomons, H. M., Dijkstra, C. and Verhulst, S.** (2014). Nestling telomere shortening, but not telomere length, reflects developmental stress and predicts survival in wild birds. *Proceedings of the Royal Society B: Biological Sciences* **281**.
- Broer, L., Codd, V., Nyholt, D. R., Deelen, J., Mangino, M., Willemsen, G., Albrecht, E., Amin, N., Beekman, M., de Geus, E. J. C. et al.** (2013). Meta-analysis of telomere length in 19 713 subjects reveals high heritability, stronger maternal inheritance and a paternal age effect. *European Journal of Human Genetics* **21**, 1163.
- Burraco, P., Díaz-Paniagua, C. and Gomez-Mestre, I.** (2017). Different effects of accelerated development and enhanced growth on oxidative stress and telomere shortening in amphibian larvae. *Scientific Reports* **7**, 7494.
- Campisi, J., Kim, S.-h., Lim, C.-S. and Rubio, M.** (2001). Cellular senescence, cancer and aging: the telomere connection. *Experimental Gerontology* **36**, 1619-1637.
- Cawthon, R. M.** (2002). Telomere measurement by quantitative PCR. *Nucleic Acids Research* **30**.
- Cram, D. L., Monaghan, P., Gillespie, R. and Clutton-Brock, T.** (2017). Effects of early-life competition and maternal nutrition on telomere lengths in wild meerkats. *Proceedings of the Royal Society B: Biological Sciences* **284**, 20171383.
- Debes, P. V., Visse, M., Panda, B., Ilmonen, P. and Vasemägi, A.** (2016). Is telomere length a molecular marker of past thermal stress in wild fish? *Molecular Ecology* **25**, 5412-5424.
- Douhard, M., Gaillard, J.-M., Delorme, D., Capron, G., Duncan, P., Klein, F. and Bonenfant, C.** (2013). Variation in adult body mass of roe deer: early environmental conditions influence early and late body growth of females. *Ecology* **94**, 1805-1814.
- Dupoué, A., Rutschmann, A., Le Galliard, J. F., Clobert, J., Angelier, F., Marcia, C., Ruault, S., Miles, D. and Meylan, S.** (2017). Shorter telomeres precede population extinction in wild lizards. *Scientific Reports* **7**, 16976.
- Elliott, J. and Hurley, M.** (1997). A functional model for maximum growth of Atlantic salmon parr, *Salmo salar*, from two populations in northwest England. *Functional Ecology* **11**, 592-603.
- Gluckman, P. D., Hanson, M. A., Cooper, C. and Thornburg, K. L.** (2008). Effect of *in utero* and early-life conditions on adult health and disease. *New England Journal of Medicine* **359**, 61-73.
- Gomes, N. M. V., Shay, J. W. and Wright, W. E.** (2010). Telomere biology in Metazoa. *FEBS Letters* **584**, 3741-3751.

**Gomez-Mestre, I., Kulkarni, S. and Buchholz, D. R.** (2013). Mechanisms and Consequences of Developmental Acceleration in Tadpoles Responding to Pond Drying. *PloS one* **8**, e84266.

**Hatakeyama, H., Yamazaki, H., Nakamura, K.-I., Izumiyama-Shimomura, N., Aida, J., Suzuki, H., Tsuchida, S., Matsuura, M., Takubo, K. and Ishikawa, N.** (2016). Telomere attrition and restoration in the normal teleost *Oryzias latipes* are linked to growth rate and telomerase activity at each life stage. *Aging (Albany NY)* **8**, 62-75.

**Hausmann, M. F. and Marchetto, N. M.** (2010). Telomeres: linking stress and survival, ecology and evolution. *Curr Zool* **56**, 714-727.

**Hausmann, M. F., Winkler, D. W., O'Reilly, K. M., Huntington, C. E., Nisbet, I. C. T. and Vleck, C. M.** (2003). Telomeres shorten more slowly in long-lived birds and mammals than in short-lived ones. *Proc.R.Soc.Lond.B* **270**, 1387-1392.

**Heidinger, B. J., Blount, J. D., Boner, W., Griffiths, K., Metcalfe, N. B. and Monaghan, P.** (2012). Telomere length in early life predicts lifespan. *Proc.Natl.Acad.Sci.,USA* **109**, 1743-1748.

**Hellemans, J., Mortier, G., De Paepe, A., Speleman, F. and Vandesompele, J.** (2007). qBase relative quantification framework and software for management and automated analysis of real-time quantitative PCR data. *Genome biology* **8**, R19.

**Hemmer-Brepson, C., Replumaz, L., Romestaing, C., Voituron, Y. and Daufresne, M.** (2014). Non-stressful temperature effect on oxidative balance and life history traits in adult fish (*Oryzias latipes*). *Journal of Experimental Biology* **217**, 274-282.

**Henriques, C. M. and Ferreira, M. G.** (2012). Consequences of telomere shortening during lifespan. *Current Opinion in Cell Biology* **24**, 804-808.

**Henson, J. D., Neumann, A. A., Yeager, T. R. and Reddel, R. R.** (2002). Alternative lengthening of telomeres in mammalian cells. *Oncogene* **21**, 598-610.

**Herborn, K. A., Heidinger, B. J., Boner, W., Noguera, J. C., Adam, A., Daunt, F. and Monaghan, P.** (2014). Stress exposure in early post-natal life reduces telomere length: an experimental demonstration in a long-lived seabird. *Proceedings of the Royal Society of London B: Biological Sciences* **281**, 20133151.

**Johnston, I. A., Manthri, S., Alderson, R., Smart, A., Campbell, P., Nickell, D., Robertson, B., Paxton, C. G. M. and Burt, M. L.** (2003). Freshwater environment affects growth rate and muscle fibre recruitment in seawater stages of Atlantic salmon (*Salmo salar* L.). *Journal of Experimental Biology* **206**, 1337-1351.

**Jonsson, B. and Jonsson, N.** (2011). Ecology of Atlantic salmon and Brown trout: habitat as a template for life histories. Dordrecht: Springer.

**Kilemade, M., Lyons-Alcantara, M., Rose, T., Fitzgerald, R. and Mothersill, C.** (2002). Rainbow trout primary epidermal cell proliferation as an indicator of aquatic toxicity: an *in vitro/in vivo* exposure comparison. *Aquatic Toxicology* **60**, 43-59.

**Lee, W.-S., Monaghan, P. and Metcalfe, N. B.** (2012). The pattern of early growth trajectories affects adult breeding performance. *Ecology* **93**, 902-912.

**Lindström, J.** (1999). Early development and fitness in birds and mammals. *Trends in Ecology & Evolution* **14**, 343-348.

**Liu, L., Bailey, S. M., Okuka, M., Munoz, P., Li, C., Zhou, L. J., Wu, C., Czerwicz, E., Sandler, L., Seyfang, A. et al.** (2007). Telomere lengthening early in development. *Nature Cell Biology* **9**, 1436-U185.

**MacQueen, D. J., Robb, D. H. F., Olsen, T., Melstveit, L., Paxton, C. G. M. and Johnston, I. A.** (2008). Temperature until the 'eyed stage' of embryogenesis programmes the growth trajectory and muscle phenotype of adult Atlantic salmon. *Biology Letters* **4**, 294-298.

**Matschak, T. W., Stickland, N. C., Mason, P. S. and Crook, A. R.** (1997). Oxygen availability and temperature affect embryonic muscle development in Atlantic salmon (*Salmo salar* L.). *Differentiation* **61**, 229-235.

**McLennan, D., Armstrong, J. D., Stewart, D. C., McKelvey, S., Boner, W., Monaghan, P. and Metcalfe, N. B.** Links between parental life histories of wild salmon and the telomere lengths of their offspring. *Molecular Ecology*, doi: 10.1111/mec.14467.

**McLennan, D., Armstrong, J. D., Stewart, D. C., McKelvey, S., Boner, W., Monaghan, P. and Metcalfe, N. B.** (2016). Interactions between parental traits, environmental harshness and growth rate in determining telomere length in wild juvenile salmon. *Molecular Ecology* **25**, 5425-5438.

**Metcalfe, N. B. and Thorpe, J. E.** (1992). Early predictors of life-history events: the link between first feeding date, dominance and seaward migration in Atlantic salmon, *Salmo salar* L. *J.Fish Biol.* **41B**, 93-99.

**Monaghan, P.** (2008). Early growth conditions, phenotypic development and environmental change. *Philosophical Transactions of the Royal Society of London B: Biological Sciences* **363**, 1635-1645.

**Monaghan, P.** (2010). Telomeres and life histories. the long and the short of it. *Ann.N.Y.Acad.Sci.* **1206**, 130-142.

**Monaghan, P. and Ozanne, S.** (2018). Somatic growth and telomere dynamics in vertebrates: relationships, mechanisms and consequences. *Philosophical Transactions of the Royal Society B: Biological Sciences* **373**, 20160446.

**Nettle, D., Monaghan, P., Gillespie, R., Brilot, B., Bedford, T. and Bateson, M.** (2015). An experimental demonstration that early-life competitive disadvantage accelerates telomere loss. *Proceedings of the Royal Society of London B: Biological Sciences* **282**, 20141610.

**Ohlsson, T., Smith, H. G., Råberg, L. and Hasselquist, D.** (2002). Pheasant sexual ornaments reflect nutritional conditions during early growth. *Proceedings of the Royal Society of London B: Biological Sciences* **269**, 21-27.

**Olsson, M., Wapstra, E. and Friesen, C.** (2018). Ectothermic telomeres: time they came in from the cold. *Philosophical Transactions of the Royal Society B: Biological Sciences* **373**, 20160449.

**Ortego, L. S., Hawkins, W. E., Walker, W. W., Krol, R. M. and Benson, W. H.** (1994). Detection of proliferating cell nuclear antigen in tissues of three small fish species. *Biotechnic & Histochemistry* **69**, 317-23.

**Passos, J. F., Saretzki, G. and von Zglinicki, T.** (2007). DNA damage in telomeres and mitochondria during cellular senescence: is there a connection? *Nucleic Acids Research* **35**, 7505-7513.

**Perez, J., Moran, P. and Garcia-Vazquez, E.** (1999). Cloning and physical mapping of Atlantic salmon (*Salmo salar* L.) telomeric sequences. *Heredity* **82**, 409.

**Peterson, D. R., Mok, H. O. and Au, D. W.** (2015). Modulation of telomerase activity in fish muscle by biological and environmental factors. *Comparative Biochemistry and Physiology, Part C: Toxicology & Pharmacology* **178**, 51-59.

**Reichert, S. and Stier, A.** (2017). Does oxidative stress shorten telomeres in vivo? A review. *Biology Letters* **13**, 20170463.

**Ridout, K. K., Levandowski, M., Ridout, S. J., Gantz, L., Goonan, K., Palermo, D., Price, L. H. and Tyrka, A. R.** (2017). Early life adversity and telomere length: a meta-analysis. *Molecular Psychiatry*, doi:10.1038/mp.2017.26.

**Royle, N. J., Lindström, J. and Metcalfe, N. B.** (2005). A poor start in life negatively affects dominance status in adulthood independent of body size in green swordtails *Xiphophorus helleri*. *Proceedings of the Royal Society of London B: Biological Sciences* **272**, 1917-1922.

**Salin, K., Auer, S. K., Rudolf, A. M., Anderson, G. J., Cairns, A. G., Mullen, W., Hartley, R. C., Selman, C. and Metcalfe, N. B.** (2015). Individuals with higher metabolic rates have lower levels of reactive oxygen species *in vivo*. *Biology Letters* **11**.

**Salmón, P., Nilsson, J. F., Watson, H., Bensch, S. and Isaksson, C.** (2017). Selective disappearance of great tits with short telomeres in urban areas. *Proceedings of the Royal Society B: Biological Sciences* **284**, 20171349.

- Scott, R., Hall, P., Haldane, J., Van Noorden, S., Price, Y., Lane, D. and Wright, N.** (1991). A comparison of immunohistochemical markers of cell proliferation with experimentally determined growth fraction. *The Journal of pathology* **165**, 173-178.
- Shearer, W. M.** (1992). Atlantic salmon scale reading guidelines. Copenhagen: International Council for the Exploration of the Sea Copenhagen.
- Simide, R., Angelier, F., Gaillard, S. and Stier, A.** (2016). Age and heat stress as determinants of telomere length in a long-lived fish, the Siberian sturgeon. *Physiological and Biochemical Zoology* **89**, 441-447.
- Spencer, K. A., Buchanan, K. L., Goldsmith, A. R. and Catchpole, C. K.** (2003). Song as an honest signal of developmental stress in the zebra finch (*Taeniopygia guttata*). *Hormones and Behavior* **44**, 132-139.
- Stickland, N. C., White, R. N., Mescall, P. E., Crook, A. R. and Thorpe, J. E.** (1988). THE EFFECT OF TEMPERATURE ON MYOGENESIS IN EMBRYONIC-DEVELOPMENT OF THE ATLANTIC SALMON (SALMO-SALAR L). *Anatomy and Embryology* **178**, 253-257.
- Ujvari, B., Biro, P. A., Charters, J. E., Brown, G., Heasman, K., Beckmann, C. and Madsen, T.** (2017). Curvilinear telomere length dynamics in a squamate reptile. *Functional Ecology* **31**, 753-759.
- Usher, M. L., Stickland, N. C. and Thorpe, J. E.** (1994). MUSCLE DEVELOPMENT IN ATLANTIC SALMON (SALMO-SALAR) EMBRYOS AND THE EFFECT OF TEMPERATURE ON MUSCLE CELLULARITY. *Journal of Fish Biology* **44**, 953-964.
- Valavanidis, A., Vlachogianni, T. and Fiotakis, C.** (2009). 8-hydroxy-2'-deoxyguanosine (8-OHdG): A critical biomarker of oxidative stress and carcinogenesis. *J Environ Sci Health C Environ Carcinog Ecotoxicol Rev* **27**, 120-39.
- Verspoor, E., Stradmeyer, L. and Nielsen, J.** (2007). The Atlantic Salmon: Genetics, Conservation, and Management. Oxford: Blackwell Publishing Ltd.
- Vinagre, C., Madeira, D., Narciso, L., Cabral, H. N. and Diniz, M.** (2012). Effect of temperature on oxidative stress in fish: Lipid peroxidation and catalase activity in the muscle of juvenile seabass, *Dicentrarchus labrax*. *Ecological Indicators* **23**, 274-279.
- Weatherley, A. H., Gill, H. S. and Lobo, A. F.** (1988). Recruitment and maximal diameter of axial muscle fibres in teleosts and their relationship to somatic growth and ultimate size. *Journal of Fish Biology* **33**, 851-859.
- Wilbourn, R. V., Moatt, J. P., Froy, H., Walling, C. A., Nussey, D. H. and Boonekamp, J. J.** (2018). The relationship between telomere length and mortality risk in non-model vertebrate systems: a meta-analysis. *Philosophical Transactions of the Royal Society B: Biological Sciences* **373**, 20160447.
- Yap, W. H., Yeoh, E., Brenner, S. and Venkatesh, B.** (2005). Cloning and expression of the reverse transcriptase component of pufferfish (*Fugu rubripes*) telomerase. *Gene* **353**, 207-217.
- Yip, B. W., Mok, H. O., Peterson, D. R., Wan, M. T., Taniguchi, Y., Ge, W. and Au, D. W.** (2017). Sex-dependent telomere shortening, telomerase activity and oxidative damage in marine medaka *Oryzias melastigma* during aging. *Marine Pollution Bulletin* **124**, 701-709.
- Yu, C. C.-W., Woods, A. L. and Levison, D. A.** (1992). The assessment of cellular proliferation by immunohistochemistry: A review of currently available methods and their applications. *The Histochemical Journal* **24**, 121-131.
- Zuo, W. Y., Moses, M. E., West, G. B., Hou, C. and Brown, J. H.** (2012). A general model for effects of temperature on ectotherm ontogenetic growth and development. *Proceedings of the Royal Society B-Biological Sciences* **279**, 1840-1846.

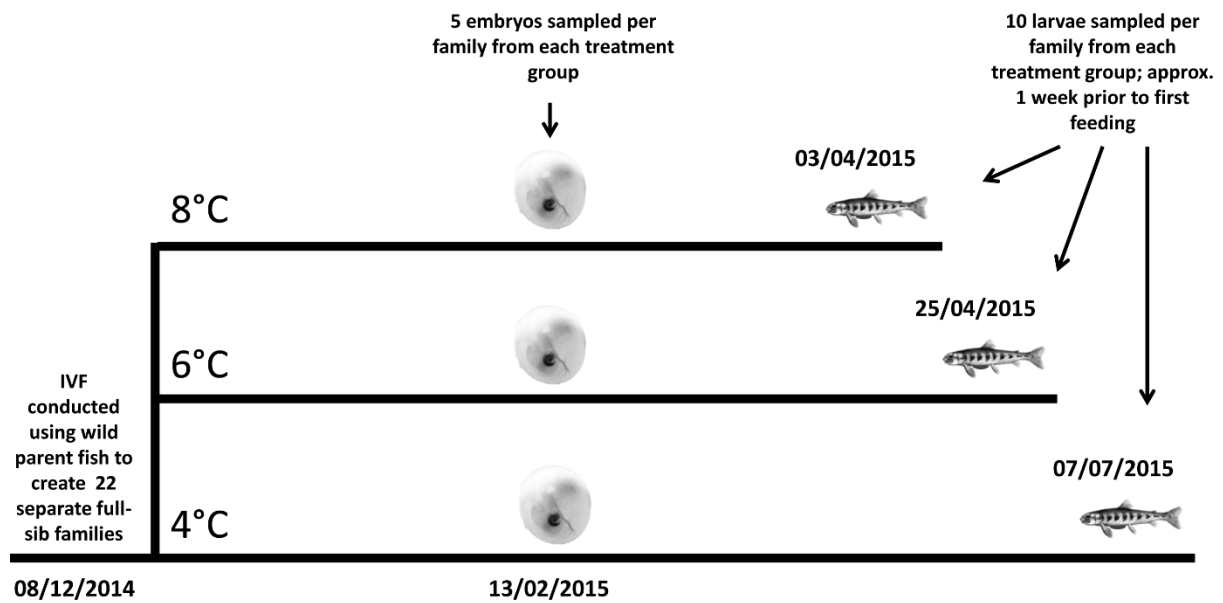

**Fig. 1. Outline of experimental timeline.** All experimental crosses were conducted on December 8<sup>th</sup> 2014. All treatment groups were initially held overnight at 4°C, to represent ambient water temperature in the native stream. The temperature treatment then started December 9<sup>th</sup> 2014, with the 6°C and 8°C group were then slowly increased from 4°C to their target temperature at a rate of 0.5°C/day.



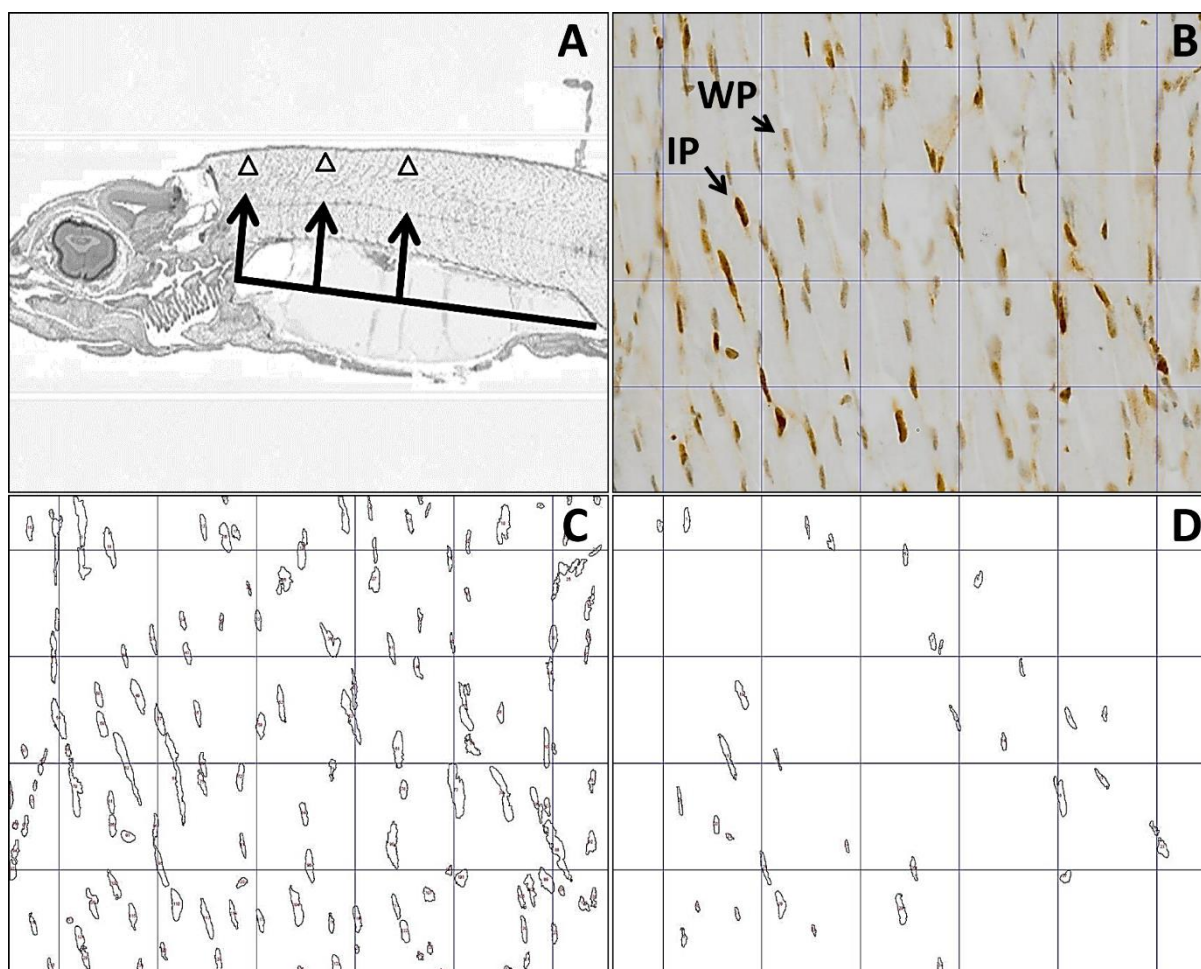

**Fig. 2. Outline of PCNA cell proliferation analysis:** A) example of a scanned immunohistochemical slide, showing how the three regions of larval dorsal myotome muscle were selected and used for 26x image capture. The horizontal thick line is the maximum longitudinal axis of the remains of the yolk sac. The triangles demonstrate the three most dorsal regions in relation to the anterior-most point, the 1<sup>st</sup> quartile and the 2<sup>nd</sup> quartile point of the horizontal line. Triangles are also representative of the size of the area that was used for image capture, B) example of an original image showing intensely PCNA-positive nuclei (IP) and weakly PCNA-positive nuclei (WP), C) the same image filtered using Image J software to select all nuclei (IP and WP), and D) the same image filtered to now show only the IP nuclei. The percentage of cells actively undergoing replication was calculated as  $100 * (IP / \text{all nuclei})$ .



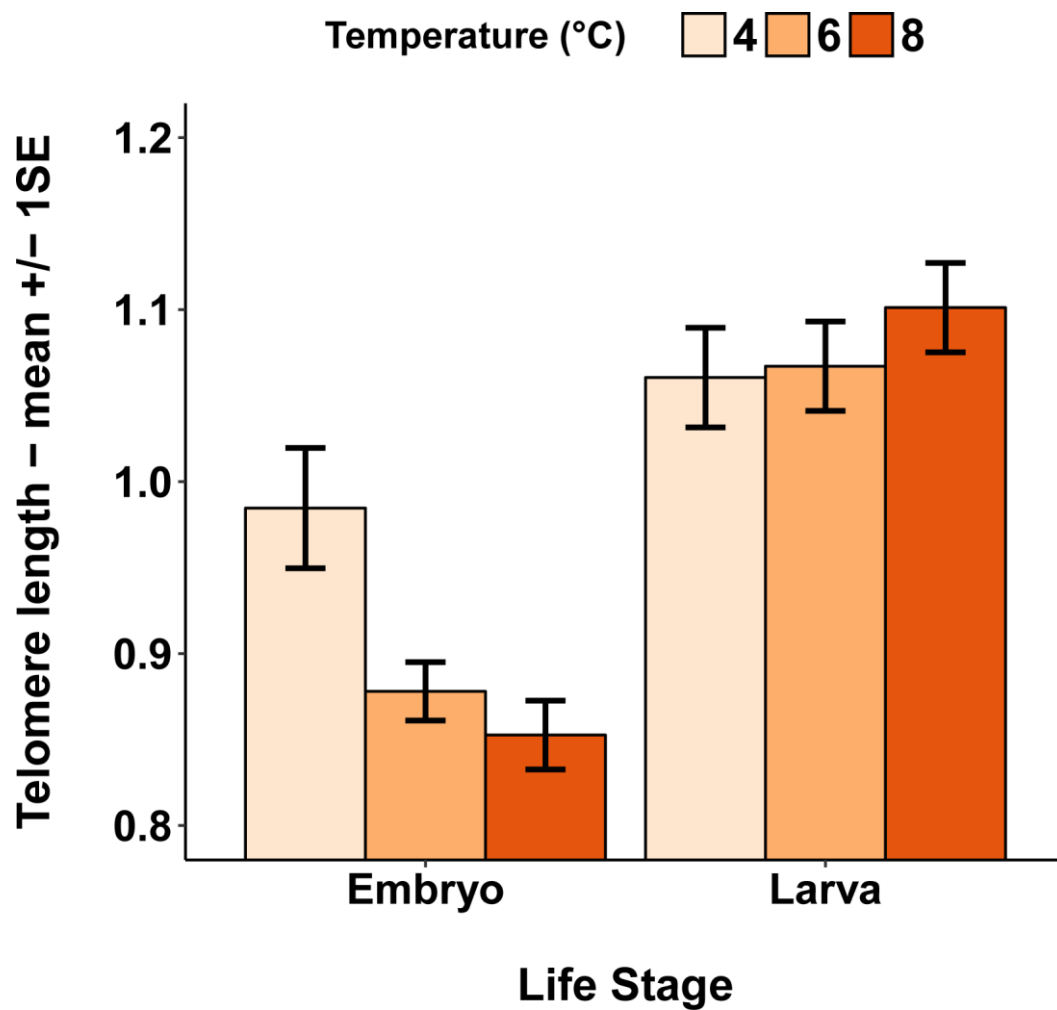

**Fig. 3.** The relative telomere length ( $\log_{10} + 1$ , for presentation purposes) of the salmon at the embryo and larva stage in relation to incubation temperature. Data plotted as  $\text{mean} \pm \text{s.e.m.}$ , with each of 22 families contributing one data point per temperature treatment per life stage.

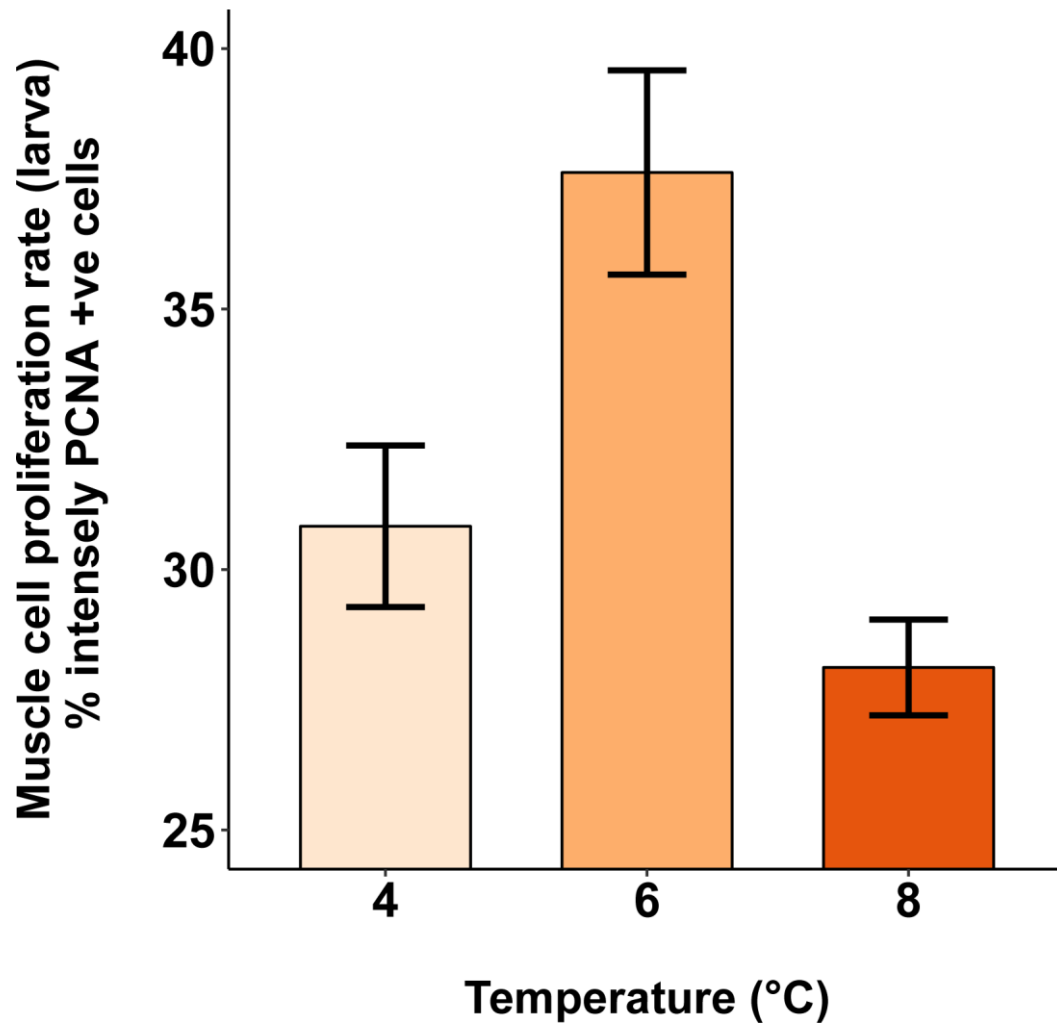

**Fig. 4. The relationship between incubation temperature and the rate of muscle cell proliferation (i.e. the percentage of intensely stained positive PCNA nuclei) at the late larval stage.** Data plotted as mean $\pm$ s.e.m, with each of 22 families contributing one data point per temperature treatment.

**Table 1. Summary of the seven initial linear mixed effect models explaining variation in: A) overall RTL, B) larva mass, C) larva cell proliferation rate, D) embryo RTL, E) larva RTL, F) embryo DNA oxidative damage and G) larva DNA oxidative damage, including all fixed factors, covariates and interactions prior to model selection.**

|          | <b>Dependent variable</b>         | <b>Fixed factors</b>          | <b>Covariates</b>                                                        | <b>Interactions</b>             |
|----------|-----------------------------------|-------------------------------|--------------------------------------------------------------------------|---------------------------------|
| <b>A</b> | <b>Overall RTL (log10)</b>        | Temp. treatment<br>Life stage | -                                                                        | Temp. treatment<br>* Life stage |
| <b>B</b> | <b>Larva weight</b>               | Temp. treatment               | -                                                                        | -                               |
| <b>C</b> | <b>Larva cell prolif. (log10)</b> | Temp. treatment               | Cell size<br>Larva weight                                                | -                               |
| <b>D</b> | <b>Embryo RTL (log10)</b>         | Temp. treatment               | Embryo DNA damage                                                        | -                               |
| <b>E</b> | <b>Larva RTL (log10)</b>          | Temp. treatment               | Cell proliferation rate<br>Cell size<br>Larva weight<br>Larva DNA damage | -                               |
| <b>F</b> | <b>Embryo DNA damage</b>          | Temp. treatment               | -                                                                        | -                               |
| <b>G</b> | <b>Larva DNA damage</b>           | Temp. treatment               | Cell proliferation rate<br>Cell size<br>Larva weight                     | -                               |

Notes: Terms were sequentially removed if not significant or if not contributing to significant interactions. Family ID was included as a random effect to control for any family effects. See Methods for full definitions. See Table 2 for a summary of the final models.

**Table 2. Summary of the seven final linear mixed-effect models explaining variation in: A) overall RTL, B) larva mass, C) larva cell proliferation rate, D) embryo RTL, E) larva RTL, F) embryo DNA oxidative damage and G) larva DNA oxidative damage.**

|          | Explanatory variable                | Num.<br>df | Den.<br>df | F     | p       | Random effect |       |
|----------|-------------------------------------|------------|------------|-------|---------|---------------|-------|
|          |                                     |            |            |       |         | Estimate      | SE    |
| <b>A</b> | <b>Life stage x Temp. treatment</b> | 2          | 103.41     | 7.65  | = 0.001 | 0.004         | 0.002 |
| <b>B</b> | -                                   |            |            |       |         |               |       |
| <b>C</b> | <b>Temp. treatment</b>              | 2          | 41.71      | 10.88 | <0.001  | 0.001         | 0.001 |
| <b>D</b> | <b>Temp. treatment</b>              | 2          | 42         | 11.41 | <0.001  | 0.006         | 0.003 |
| <b>E</b> | -                                   |            |            |       |         |               |       |
| <b>F</b> | -                                   |            |            |       |         |               |       |
| <b>G</b> | -                                   |            |            |       |         |               |       |

Notes: See Table 1 for the main effects and interactions initially included in each model. Terms were sequentially removed if not significant or if not contributing to significant interactions; blanks in the table indicate models in which none of the terms were significant. Family ID was included as a random effect to control for any family effects. See Methods for full definitions.
